# Supplementary material for: Interdisciplinary Management of Radicular Cyst in Anterior Maxilla - A Case Report
Source: Preprints.org preprint supplement (doi:10.20944/preprints202206.0220.v1), 2022-06-15
Supplement: Supplementary file 1 [file supplementary]

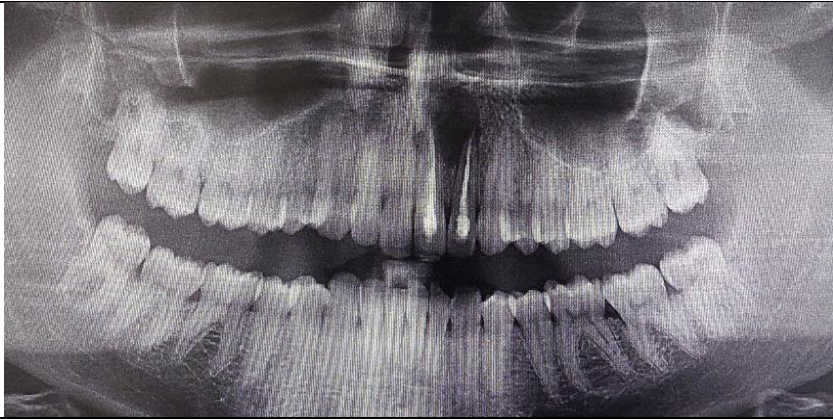

Figure 1 : Preoperative radiography : large radiolucent image in the apical area regarding 21-22

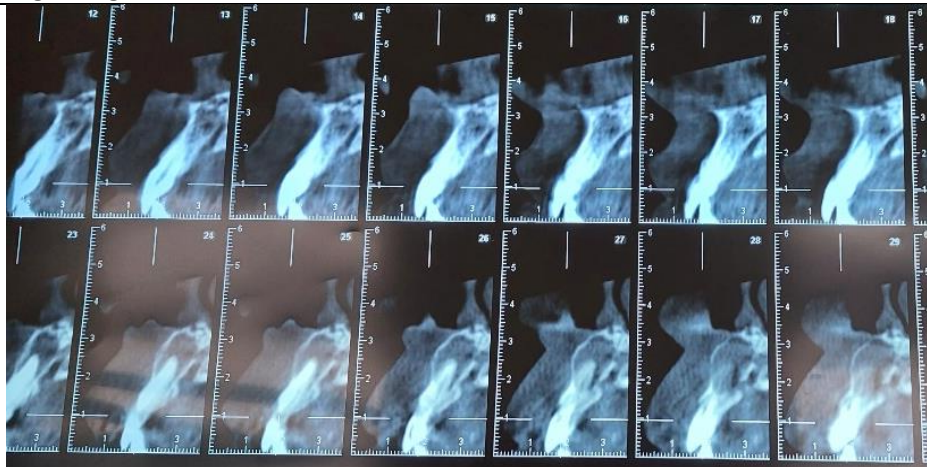

Figure 2 : CBCT investigation : confirmation of initial diagnosis : periapical cyst with bone fenestration

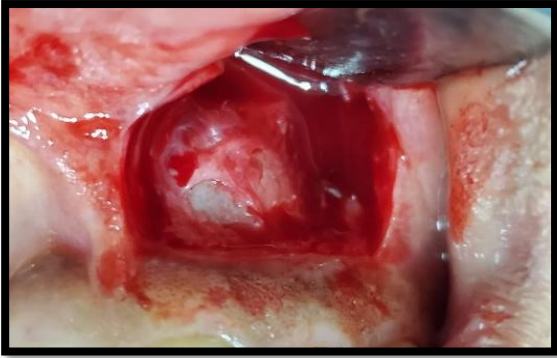

Figure 3 : Perforation of the vestibular cortical

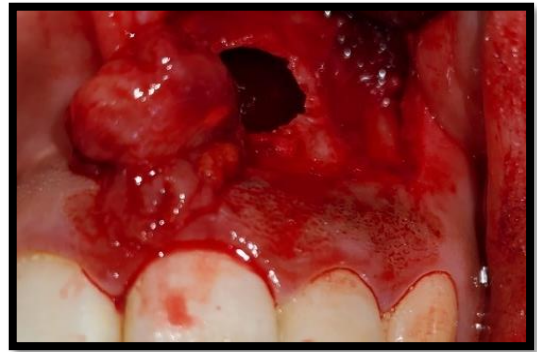

Figure 4 : remove of the whole cyst without membrane separation

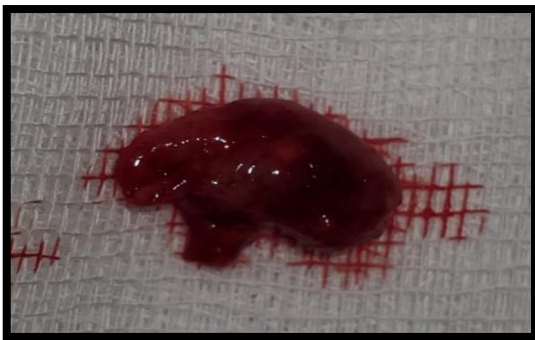

Figure 5 : excised specimen

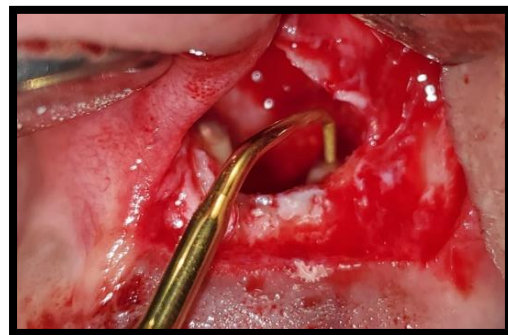

Figure 6 : root-end preparation with ultrasonic tips

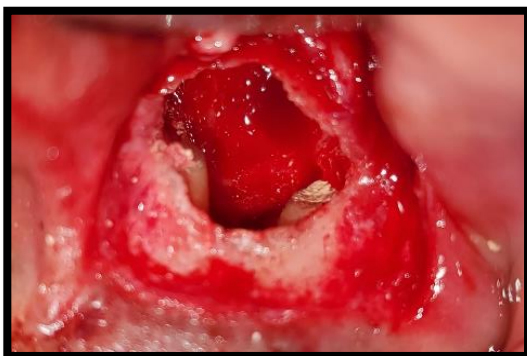

Figure 7 : cavity filled with BIODENTINE

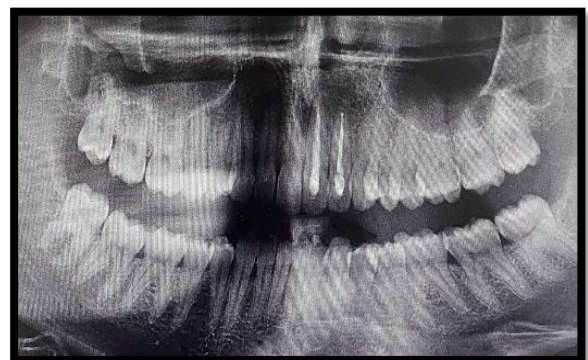

Figure 8 : Radiographic 6 months follow up : reossification of the lesion
